# Supplementary material for: Basic Life Support (BLS) Knowledge Among General Population in Arab Countries: A Multinational Study in Nine Arab Countries
Source: Research Square preprint supplement (doi:10.21203/rs.3.rs-2472992/v1), 2023-01-18
Supplement: Supplementary file 1 [file 4ae668e7156d524075e65304.docx]

**Supplementary File 2: Questionnaire**

English version of the questionnaire

**PART ONE**: **SOCIO-DEMOGRAPHIC AND GENERAL INFORMATION**

Q1. Age --------------- Q 2. Gender 1. Male 2. Female

Q3. Residence? 1. Urban 2. Rural

Q4. Educational status

1. No formal education 2. Formal education

Q 5. Marital status?

1. married 2. Single 3. Widowed 4. Divorced

Q6. Religious?

1. Muslim 2. Christian 3. Jewish 5. Others Q 7. Did you take basic life support training before?

1. Yes 2. No

Q8. Type of training? 1. Theoretical training 2. Practical training 3. Both

Q9. The number of training sessions before?

1. One 2. Two 3. Three or more

Q10. If your answer to question no - 9 'is yes, 'where were you trained?

Q11. Did you hear about basic life support? 1. Yes 2. No Q12. If Yes, for Q-11 source of information?

1. Reading materials 2. Media 3. Health professionals 4. Friends and relatives Q13. Did you get an emergency case that needs basic life support?

1. Yes 2.No

**PART TWO: KNOWLEDGE QUESTIONS**

Q1. When should be basic life support given during an accident?

1. Immediately 2. In Hospital. 3. I don't know Q2. Who should give basic life support during an accident?

1. Health care worker 2. Community policy.

3. Scene bystanders including Community. 4. I don't know Q3. Is being an Unconscious sign of cardiac arrest?

1. Yes 2. No 3. I don’t know

Q4. If you yes for Q-3, how can you have recognized Unconscious?

1. No reaction to voice 2. No reaction to touch 3. No movements 4. Don't know Q5. Is the absence of breathing a sign of cardiac arrest?

1. Yes 2. No

Q6. If you yes for Q-5, how can you recognize the absence of breathing?

1. No breathing moves 2. No breathing sound 3. No expired air

4. Mirror in front of victim’s mouth 5. Don’t know

Q7. Is the absence of circulation a sign of cardiac arrest?

1. Yes 2. No

Q8. If Yes for Q-7, how can you recognize absence circulation?

1. Palpation of neck arteries 2. Palpation of arm arteries 3. I don’t know

Q9. Moving patients from accident sites is a component of basic life support

1. Yes 2. No 3. I don’t know

Q10. Stopping bleeding is a component of basic life support.

1. Yes 2. No 3. I don’t know

Q11. Applying to splint for fractures is a component of basic life support

1. Yes 2. No 3. I don’t know

Q12. Communicate to emergency medical service -939 is a component of basic life

1. Yes 2. No 3. I don’t know

Q13. Transporting patients to hospitals is a component of basic life support

1. Yes 2. No 3. I don’t know

Q14. Noisy breathing is a sign of airway problem for the victim

1. Yes 2. No 3. I don’t know

Q15. Fast breathing is a sign of an airway problem for the victim

1. Yes 2. No 3. I don’t know

Q16. Slow breathing is a sign of airway problem for the victim

1. Yes 2. No 3. I don’t know

Q17. No breathing is a sign of an airway problem for the victim

1. Yes 2. No 3. I don’t know

Q18. Jaw thrust is a procedure used to open the airway of victims

1. Yes 2. No 3. I don’t know

Q19. Head tilt and chin left is a procedure used to open the airway for accident victims

1. Yes 2. No 3. I don’t know Q20. Mouth to mouth is used for giving breath.

1. Yes 2. No 3. I don’t know

Q21. The mouth to the nose is used for giving breath.

1. Yes 2. No 3. I don't know

Q22. Keep the person's neck and back straight with your hand while shifting a patient to the hospital, a thing you should always assume if the cervical injury is present

1. Yes 2. No 3. I don’t know

Q23. Keep the person's neck and back straight with a hardboard while shifting a patient to the hospital, a thing you should always assume if the cervical injury is present

1. Yes 2. No 3. I don’t know

Q24. If there is only a limb injury, the patient is transferred in a sitting position while shifting a patient to the hospital, a thing you should always assume if the cervical injury is present

1. Yes 2. No 3. I don’t know

Q25.Bleeding from the injured site is a sign of bleeding from the injured sight.

1. Yes 2. No 3. I don’t know

Q26.Victim becoming collapse is the sign of bleeding from the injured sight?

1. Yes 2. No 3. I don’t know

Q27.Weak and Fast pulse and increased respiratory rate is the sign of bleeding from the injured sight. 1. Yes 2. No 3. I don’t know

Q28.Apply tourniquet is important to stop bleeding.

1. Yes 2. No 3. I don’t know

Q29. Apply pressure and pressing are important to stop bleeding.

1. Yes 2. No 3. I don’t know

Q30. Lifting the injured part above the body level is important to stop bleeding. 1. Yes 2. No 3. I don’t know
